1 **Hidden state models improve the adequacy of state-dependent diversification approaches**  
2 **using empirical trees, including biogeographical models**

3 Daniel S. Caetano<sup>1,3</sup>, Brian C. O’Meara<sup>2</sup>, and Jeremy M. Beaulieu<sup>1</sup>

4 <sup>1</sup>Department of Biological Sciences, University of Arkansas, Fayetteville AR 72701.

5 <sup>2</sup>Department of Ecology and Evolutionary Biology, University of Tennessee, Knoxville TN  
6 37996-1610

7 <sup>3</sup>Author for correspondence: Daniel S. Caetano, Email: [dcaetano@uark.edu](mailto:dcaetano@uark.edu)

8 *Author contributions:* JMB and BCO conceived the hidden-Markov approach applied to SSE  
9 models. DSC, BCO, and JMB designed simulations, derived models, implemented model  
10 averaging and R code. DSC conducted simulations. JMB conducted empirical analyses. DSC,  
11 BCO, and JMB wrote the manuscript.

12 *Acknowledgements:* We thank members of the Beaulieu, O’Meara, and Alverson labs for their  
13 comments and for general discussions of the ideas presented here; we especially thank Teo  
14 Nakov and James Boyko. We would also like to specifically thank Andrew Alverson and Stacey  
15 Smith for their insightful critiques and helpful edits on an earlier version of this manuscript. DSC  
16 would also like to thank the Coordenação de Aperfeiçoamento de Pessoal de Nível Superior  
17 (CAPES: 1093/12-6) for the opportunity to work on this project.

18 *Supplementary material:* The Supplementary material is available from FigShare (  
19 <https://doi.org/10.6084/m9.figshare.6146801.v1> )

20 *Abstract* -- The state-dependent speciation and extinction models (SSE) have recently been  
21 criticized due to their high rates of “false positive” results and many researchers have advocated  
22 avoiding SSE models in favor of other “non-parametric” or “semi-parametric” approaches. The  
23 hidden Markov modeling (HMM) approach provides a partial solution to the issues of model  
24 adequacy detected with SSE models. The inclusion of “hidden states” can account for rate  
25 heterogeneity observed in empirical phylogenies and allows detection of true signals of  
26 state-dependent diversification or diversification shifts independent of the trait of interest.  
27 However, the adoption of HMM into other classes of SSE models has been hampered by the  
28 interpretational challenges of what exactly a “hidden state” represents, which we clarify herein.  
29 We show that HMM models in combination with a model-averaging approach naturally account  
30 for hidden traits when examining the meaningful impact of a suspected “driver” of  
31 diversification. We also extend the HMM to the geographic state-dependent speciation and  
32 extinction (GeoSSE) model. We test the efficacy of our “GeoHiSSE” extension with both  
33 simulations and an empirical data set. On the whole, we show that hidden states are a general  
34 framework that can generally distinguish heterogeneous effects of diversification attributed to a  
35 focal character.

36 *Key words* -- BiSSE, biogeography, GeoSSE, hidden Markov, HiSSE, model-averaging

## 37 **Introduction**

38           Determining the impact that trait evolution has on patterns of lineage diversification is a  
39 fundamental and core question in evolutionary biology. The state speciation and extinction (SSE;  
40 Maddison et al. 2007) framework was developed specifically for these purposes, as it provides a  
41 means of correlating the presence or absence of a particular character state on diversification  
42 rates. Since the initial model was published, which modeled the evolution of a single binary  
43 character (i.e., BiSSE; Maddison et al. 2007, FitzJohn et al. 2009), the SSE framework has been  
44 expanded to deal with multiple state/traits (MuSSE: FitzJohn 2012), continuous traits (QuaSSE:  
45 FitzJohn, 2010), to test whether change happens at speciation events or along branches (ClasSSE:  
46 Goldberg and Iqic 2012; BiSSE-ness: Magnuson-Ford and Otto 2012), which also includes a  
47 nested subset of models that examines geographic range evolution (GeoSSE: Goldberg et al.  
48 2011), and to account for “hidden” states that may influence diversification, on their own or in  
49 combination and possible interaction with observed states (HiSSE; Beaulieu and O’Meara 2016).

50           The initial wave of interest and use of SSE models is quickly being replaced with  
51 widespread skepticism about their use (see O’Meara and Beaulieu 2016). One major reason is  
52 based on the simulation study of Rabosky and Goldberg (2015). Their analyses showed that if a  
53 tree evolved under a heterogeneous branching process, completely independent from the  
54 evolution of the focal character, SSE models will almost always return high support for a model  
55 of trait-dependent diversification. From an interpretational standpoint, this is certainly troubling.  
56 However, this also stems from the misconception that any type of SSE model is a typical model  
57 of trait evolution like in, say Pagel (1994) or Butler and King (2004), where the likelihood  
58 function maximizes the probability of the observed trait information at the tips, given the model  
59 *and* the tree. In these models, the phylogenetic tree certainly affects the likelihood of observing  
60 the traits, but that is the only role it plays. Other models based on the birth-death process for  
61 understanding tree growth and shape (e.g., Nee et al. 1994, Rabosky and Lovette 2008, Morlon  
62 et al. 2011) only calculate the likelihood of the tree itself, ignoring any and all traits. An SSE  
63 model is essentially a combination of these: it computes the joint probability of the observed  
64 states at the tips *and* the observed tree, given the model. This is an important distinction because  
65 if a tree violates a single regime birth-death model due to trait-dependent diversification, mass

66 extinction events, maximum carrying capacity, or other factors, then even if the tip data are  
67 perfectly consistent with a simple trait evolution model, the tip data *plus* the tree are not. In such  
68 cases the SSE model is very wrong in assigning rate differences to a neutral trait, but it is also  
69 wrong in saying that the tree evolved under unchanging speciation and extinction rates. This  
70 leaves practitioners in quite a bind because the “right” model is not something that could be  
71 tested in the SSE framework.

72         These results have created continued concerns in the community with respect to SSE  
73 models. There are reasons to be concerned, but, in our view, there is a deeper issue with the  
74 misinterpretation of hypothesis testing. First, with any comparative model, including SSE,  
75 rejecting the “null” model does not imply that the alternative model is the true model. It simply  
76 means that the alternative model fits *less* badly. Misunderstanding of null hypothesis testing, and  
77 its dubious utility, has been a prominent issue for decades in other fields (i.e., Berkson 1938,  
78 Kirk 1996). Second, in biological examples, including many of those used for testing Type I  
79 error (e.g., Rabosky and Goldberg 2015), the apparent issues with SSE models isn't a matter of  
80 high Type I error rate at all, it is simply comparing a trivial “null” model (i.e., equal rates  
81 diversification) against a model of trait-dependent diversification. Again, given the rich  
82 complexity of processes affecting diversification (e.g., mass extinctions, local extinctions,  
83 competition, and biogeographic changes) and trait evolution (e.g., varying population size,  
84 selection pressure, and available variation), a comparison of “one rate to rule them all” versus  
85 “something a bit more complex” will usually return the latter as a better descriptor of the data. A  
86 fairer comparison involves a “null” model that contains the same degree of complexity in terms  
87 of the number of different classes of diversification rates that are also independent of the  
88 evolution of the focal character, to allow for comparisons among trait-dependent models of  
89 interest (Figure 1; also Beaulieu and O’Meara 2016). The development of the hidden state SSE  
90 model (HiSSE; Beaulieu and O’Meara 2016) provides a means of including unobserved  
91 “hidden” characters into the model that can account for the differences in diversification.

92         Aside from issues related to model rejection, and what is the appropriate “null”  
93 comparison, there are also broader issues related to any interpretation of trait-dependent  
94 diversification. For instance, a typological flaw in these types of analyses is the implicit

95 assumption that a single trait is the primary driver of diversification, thereby ignoring alternate  
96 sources of rate variation. In reality, nearly all traits exert at least *some* effect on speciation and/or  
97 extinction rates. Even something as modest as a different base at a third codon position that leads  
98 to the same amino acid can have a tiny fitness difference (Yang and Nielsen 2008), which in  
99 theory could make a species infinitesimally closer to extinction. Moreover, even among traits we  
100 think have a greater effect, it is unlikely that *only* this one examined trait accounts for the  
101 increased diversification rates. In other words, if we are studying, say, growth habit, it is very  
102 unlikely that traits like floral symmetry, pollination syndrome, biogeography, fruit dispersal, etc.  
103 all have exactly zero effect on diversification. It should, therefore, always be difficult to ever  
104 confidently view any one character state as the true underlying cause of changes in  
105 diversification rates. The inclusion of “hidden” traits, again, provides a means of testing  
106 intuitions about a particular character, while also “soaking” up variation in diversification rates  
107 that is also driven by some unknown or unmeasured factor (which may interact with the  
108 particular character, as well).

109 The use of “hidden” states, and the hidden Markov modelling approach (HMM) in  
110 general, addresses multiple issues at once and are fairly simple to implement in an SSE  
111 framework. They are, however, challenging from an interpretational standpoint. For example,  
112 what does a “hidden” state mean? How does one weigh evidence for or against trait-dependent  
113 and trait-independent diversification in the presence of “hidden” rates? The purpose of this study  
114 is twofold. First, given the confusion over whether SSE models remain a viable means of  
115 assessing state-dependent diversification (e.g., Rabosky and Goldberg 2017), we further clarify  
116 the concept of “hidden” states as well as the misconceptions of “Type I errors”. Second, we  
117 demonstrate the role of hidden state models as a general framework by expanding the original  
118 geographic state speciation and extinction model (GeoSSE; Goldberg et al. 2011). We define a  
119 set of biologically meaningful models of area-independent diversification (AIDiv) to be included  
120 in studies of area-dependent diversification (ADDiv) that can be used in combination with the  
121 original GeoSSE formulation. Such models are especially useful given the recent clarification on  
122 the undesirable impact of cladogenetic events on the performance of dispersal-extinction-  
123 cladogenesis models (DEC; Ree and Smith 2008 and DEC+J; Matzke 2014) as well as the

124 renewed advocacy of using SSE models when examining patterns of geographic range evolution  
125 (Ree and Sanmartín 2018).

## 126 **The value of incorporating “hidden” states into SSE models**

127 As mentioned above, SSE models are routinely criticized on the grounds that they almost  
128 always show increased levels of “Type I error” (Rabosky and Goldberg 2015). That is, when  
129 fitted to a tree evolved under a heterogeneous branching process independent from the evolution  
130 of the focal character, SSE models will almost always return high support for a trait-dependent  
131 diversification model over a trivial “null” model that assumes equal diversification rates.  
132 However, as pointed out by Beaulieu and O’Meara (2016), this particular issue does not  
133 represent a case of Type I error, but, rather, a simple problem of rejecting model  $X$ , for model  $Y$ ,  
134 when model  $Z$  is true. Furthermore, rejecting model  $X$  for model  $Y$ , does not imply that model  $Y$   
135 is the true model. It simply means that model  $Y$  is a better *approximation* to model  $Z$ , than model  
136  $X$ . This will be generally be true if model  $X$  is overly simplistic (i.e., diversification rates are  
137 equal) with respect to the complexity in either model  $Y$  and model  $Z$  (i.e., diversification rates  
138 vary).

139 The story of the boy that cried wolf is a popular mnemonic for understanding what we  
140 mean when we refer to the difference between true Type I and Type II error, which can be  
141 extended to include comparisons between complex and overly simplistic models. When the boy  
142 first cried wolf, but there was no wolf, he was making a Type I error -- that is, falsely rejecting  
143 the null of a wolf-free meadow. When the townspeople later ignored him when there was  
144 actually a wolf, they were making a Type II error. If the sheep were instead perishing in a  
145 snowstorm, and the only options for the boy are to yell “no wolf!” or “wolf!” it is not clear what  
146 the best behavior is -- “no wolf” implies no change in sheep mortality rates from when they  
147 happily gambol in a sunny meadow, even though they have begun to perish, while “wolf”  
148 communicates the mortality increase even though it is the wrong mechanism. It is the same here  
149 when looking at a tree coming from an unknown, but complex empirical branching process and  
150 trying to compare a constant rate model (“no wolf”) against a trait-dependent (“wolf”),  
151 age-dependent (“bear”), or density-dependent model (“snowstorm”).

152 Beaulieu and O'Meara (2016) proposed a set of character-independent diversification  
153 (CID) models that are parameterized so that the evolution of each observable character state is  
154 independent of the diversification process without forcing the diversification process to be  
155 constant across the entire tree. Importantly, hidden state models are part of a more general  
156 framework that should be applied to any SSE model, regardless of *a priori* interest in unobserved  
157 factors driving diversification. For instance, the likelihood of a standard BiSSE model is  
158 *identical* to a HiSSE model where the observed states each have their own unique diversification  
159 rates, with the underlying “hidden” states constrained to have the same parameter values. This is  
160 best illustrated in Figure 1. Both phylogenetic trees show variation in diversification rates, so the  
161 question is whether such rate shifts can be predicted by the observed traits or not. The  
162 state-dependent and independent models with respect to a focal trait both have two hidden states  
163 (*A* and *B*) and four free diversification parameters. The difference between the models in Figure  
164 1 resides solely in the way the variation among the hidden states is partitioned. If we set the  
165 hidden rates to vary within each observed state, such that all hidden states of  $\lambda_0$  and  $\mu_0$  are  
166 independent of  $\lambda_1$  and  $\mu_1$  (Figure 1, left panel), we produce a state-dependent BiSSE model.  
167 Alternatively, if the observed states share the same diversification rate, and rate variation is  
168 partitioned among hidden rate classes (Figure 1, right panel), we produce a state-independent  
169 model, which is independent of the focal state, but not the hidden state. More complex  
170 state-dependent models can be created by letting multiple hidden rate categories be estimated  
171 within the observed state (see examples in Beaulieu and O'Meara 2016). Of course, in the case of  
172 BiSSE (as well as any other of the original SSE implementations), there is little sense in referring  
173 to the single observed rate category as “hidden”, since the hidden states are constrained to have  
174 the same parameter values. Nevertheless, the usefulness of the state-independent models (CID) is  
175 that they partition the rate variation among hidden rate categories and not among observed states.  
176 For a fairer comparison to a state-dependent diversification model, any alternative CID model  
177 must be devised to fit the same number of diversification rate categories to the phylogeny (i.e.,  
178 same number of free speciation and extinction rates, such as shown in Figure 1).

179 A natural corollary, then, is that the usefulness of the hidden state modelling approach  
180 depends entirely on the careful match of free diversification parameters between the



181 state-dependent and state-independent diversification models. These models will also return  
182 “false positives” when the proper counter balance to a trait-dependent model is not included in  
183 the set of models evaluated. This was recently demonstrated by Rabosky and Goldberg (2017).  
184 Under a range of very difficult scenarios, their non-parametric approach differentiated between  
185 scenarios of trait-dependent and trait-independent diversification much better than a parametric,  
186 process-based hidden state SSE model. Specifically, they found that while the inclusion of a  
187 character-independent model with two diversification rate categories (i.e., CID-2) reduced the  
188 overall “false positive” rate of BiSSE, the use of BiSSE + CID-2 + HiSSE resulted in nine of 34  
189 trait-independent diversification scenarios having “false-positive” rates in excess of 25%. The  
190 results of Rabosky and Goldberg (2017) show that appropriate null models help, but they are not  
191 a panacea. However, we hasten to point out that this result is partly due to not including  
192 sufficiently complex null models that are able to capture enough variation in diversification rates  
193 across the phylogenies. In fact, the most parameter-rich model tested by Rabosky and Goldberg  
194 (2017) assumed trait-dependent diversification. A proper set of CID models for hidden state SSE  
195 methods will, necessarily, have the same number of free diversification parameters than the  
196 state-dependent models (the CID-4 in this case). When proper null models are included, the  
197 “false positive” rates dropped in all scenarios (see Figure 2). Moreover, the improvement in  
198 performance was dramatic in the same nine scenarios that previously showed high  
199 “false-positive” rates (see Figure 6 in Rabosky and Goldberg 2017). Thus, not just any null  
200 model will suffice, but once appropriately complex ones are included, Type I properties approach  
201 desired values.

## 202 **What (if anything) is a hidden character?**

203 Common difficulties that come with hidden Markov models applied to comparative  
204 analyses are “what exactly does the hidden state represent?”, which leads to the most pressing  
205 question of “how should I interpret results when I find evidence for one or more hidden states  
206 influencing diversification?” Before moving forward, it is important to note a continuum across  
207 models of traits and diversification, such as the SSE models, and those that fit diversification  
208 rates to trees but ignore character information altogether (LASER, Rabosky 2006; MEDUSA,



209 Alfaro et al. 2009; TreePar, Stadler 2011; BAMM, Rabosky 2014; among others). While all these  
210 models are often treated as unrelated frameworks, they are really two ends of a continuum. On  
211 one end lie models such as MEDUSA and BAMM that make no explicit hypotheses about how  
212 traits impact diversification, but implicitly assume the inferred shifts must be tied to something  
213 about the organism or its environment. In fact, these models can be considered “hidden state  
214 only” models, in that shifts in diversification could be related to a single unmeasured character  
215 or, more realistically, to an evolutionary coordination among a suite of traits and  
216 trait-environment interactions. In other words, it is not controversial to assert that most  
217 characters have at least some influence on diversification, however trivial, and that even when  
218 not explicitly identifying a character focus, we are doing so implicitly. This is precisely why  
219 trait-based interpretations come as part of post-hoc interpretations that assert the putative  
220 causality of shifts in diversification inferred with MEDUSA or BAMM.

221 On other end of the continuum, we may have a hypothesis about particular character  
222 states and their impact on diversification, which we test with any one of the many available -SSE  
223 models. However, such questions increasingly now come with the added burden of mitigating  
224 factors that may erroneously produce meaningful differences in diversification among character  
225 states (Maddison and FitzJohn 2015, Beaulieu and O’Meara 2016), which ultimately leads us  
226 towards a middle ground of blending tree-only and strict -SSE type models. For instance, as  
227 mentioned above, we must account for the possibility that diversification rates may actually vary  
228 independently of our special character of interest. Even when diversification rates are tied to a  
229 particular focal character state, we must also account for complicated correlations between our  
230 trait of interest with one or more unmeasured characters that can vary among clades (Beaulieu  
231 and O’Meara 2016). We should also account for additional processes, such as whether speciation  
232 events (cladogenesis) exert an effect on the character even if it may seem inconsistent with our  
233 initial hypothesis of how a particular state evolves. The important point here is that without  
234 accounting for any or all of these factors, and by explicitly staying on the strict end of the -SSE  
235 spectrum, we run the risk of overstating the meaningfulness of the diversification differences  
236 among character states.

237           So, what, if anything, is the purpose of a hidden state model? Simply put, it is a means by  
238 which we can account for the hidden majority of traits while examining the meaningful impact of  
239 a suspected “driver” of diversification. The nature of the empirical question of whether character  
240 state  $X$  has a meaningfully higher rate than character state  $Y$  does not, and should not, change  
241 when including hidden characters. However, we emphasize that this type of question serves no  
242 purpose if character states  $X$  and  $Y$  alone are not adequate predictors for diversification rates. In  
243 this case, neither the “null” model, where diversification rate for  $X$  and  $Y$  are the same, nor the  
244 alternative model of trait-dependent diversification will be adequate. If we ignore within trait  
245 variation in diversification rates, it is really not surprising that erroneous conclusions are made.  
246 For these reasons, we advocate moving beyond just rejecting trivial null models, by making  
247 comparisons among a variety of models, looking at the weight for each, and making biological  
248 conclusions based on some summary of these models and their parameter estimates.

### 249 **The importance of model-averaging**

250           We adopt an approach that integrates the estimate from every model in the set in  
251 proportion to how much the model is able to explain the variance in the observed data (i.e.,  
252 model-averaging by Akaike weight,  $w_i$ ). Although the Akaike weights can also be used to rank  
253 and select the “best” model(s), the fundamental difference between approaches is that  
254 model-averaging largely alleviates the subjectivity of choosing thresholds to rank models, and  
255 permits the estimation of parameters taking into account the uncertainty in model fit. For  
256 instance, it is not unusual for a set of models, ranked according to their AIC values, to suggest  
257 that three or four models fit about “equally well”. The model choice framework provides no easy  
258 solution for such instances and, importantly, the conclusions about the biological questions at  
259 hand end up hampered by potentially conflicting interpretations from the models. Parameter  
260 estimates averaged across these models, on the other hand, will result in a unique scenario which  
261 incorporates the uncertainty associated with the fit of multiple models. For example, in the case  
262 of the data sets simulated by Rabosky and Goldberg (2017), the scenario that exhibited one of the  
263 worst “false positive” rates, even after properly accounting for the CID-4 in the model set, had a  
264 model-averaged tip ratio between observed states,  $0$  and  $1$ , distributed around 1 (see Figure 2).

265 This indicates that, on average, there were no meaningful diversification rate differences among  
266 the observed states. More importantly, this is a clear example of a case in which “false-positive”  
267 results are not as dire as they seem, because parameter estimates for the model show no strong  
268 effect of state-dependent diversification (see similar discussion in Cooper et al. 2016b).

269 The procedure to perform parameter estimates starts by computing the marginal  
270 probability of each ancestral state at an internal node using a standard marginal ancestral state  
271 reconstruction algorithm (Yang et al. 1995, Schluter et al. 1997), though using the SSE model  
272 rather than just a model for the trait. The marginal probability of state  $i$  for a focal node is the  
273 overall likelihood of the tree and data when the state of the focal node is fixed in state  $i$ . Note  
274 that the likeliest tip states can also be estimated, because while we observe state  $I$ , the underlying  
275 hidden state could either be  $IA$  or  $IB$ . For any given node or tip we traverse the entire tree as  
276 many times as there are states in the model. Second, the weighted average of the likeliest state  
277 and rate combination for every node and tip is calculated under each model, with the marginal  
278 probability as the weights. Finally, the rates and states for all nodes and tips are averaged across  
279 all models using the Akaike weights. These model-averaged rates, particularly among extant  
280 species, can then be examined to determine the tendency of the diversification rates to vary  
281 among the observed character states. This procedure is implemented in the *hisse* package  
282 (Beaulieu and O’Meara 2016).

283 One important caveat about model-averaging is making sure the models that are being  
284 averaged provide reasonable parameter estimates. Including a model with a weight of 0.00001,  
285 but a parameter estimate millions of times higher than other models’ estimates for that parameter,  
286 will have a substantial effect on the model-average. Even with this approach, examining results  
287 carefully, and communicating any issues and decisions to cull particular models transparently,  
288 remains important.

## 289 **Similarities between BMM and model-averaging using AIC<sub>w</sub>**

290 Model-averaging approaches have been widely used in phylogenetics (e.g., Posada 2008,  
291 Eastman et al. 2011, Rabosky 2014), but most applications have focused on Bayesian methods.  
292 For example, BMM (Rabosky 2014) applies a reversible-jump Markov-chain Monte Carlo  
293 (rjMCMC) sampler (Green 1995). The “reversible-jump” part means that the MCMC will visit  
294 multiple models by adding and subtracting parameters using birth and death proposal steps. This  
295 is a Bayesian method, thus a prior is used to control the weight given to different numbers of rate  
296 shifts (Rabosky 2014). The rjMCMC will adjust the complexity of the model in function of the  
297 likelihood weighted by the prior (i.e., the posterior). This approach returns a posterior  
298 distribution of shifts in net diversification and locations in the phylogenetic tree.

299 The SSE trait-independent models using hidden states (CID - Beaulieu and O’Meara  
300 2016) have a similar purpose to the trait-agnostic analyses of rates of diversification performed  
301 with BMM. In both cases we want to compute the likelihood of the tree including rate  
302 heterogeneity in the absence of any (explicit) predictor. As we discussed before, the important  
303 attribute of the CID models is that these can accommodate rate heterogeneity using hidden states,  
304 in contrast to simple null models, such as in BiSSE. Since the true number of rate shifts in  
305 empirical trees is unknown, we need to fit multiple trait-independent models with varying  
306 number of hidden rate categories. While BMM has a built-in machinery to grow and shrink the  
307 number of rate regimes in the models as part of the rjMCMC, HiSSE (as well as GeoHiSSE,  
308 which we describe below) requires the user to provide a set of models with an adequate number  
309 of rate categories (i.e., hidden states). However, it is possible to dredge across a set of possible  
310 models with a simple script and summarize results using model averaging (see *Supplementary*  
311 *Material*). More importantly than approximating the number of rate shifts in tree, the number of  
312 free diversification rate categories of the trait-independent models always need to match the rate  
313 categories present in the trait-dependent alternative models (as shown in Figure 1).

314 The similarity between the application of model-averaging in a likelihood framework and  
315 Bayesian model-averaging is that, in both cases, the result is a collection of models weighted by  
316 some quantity proportional to a measure of fit. In the case of model averaging across a set of  
317 maximum likelihood estimates, the quantity used is the Akaike weight which are considered the

318 weight of evidence in favor of a given model relative to all other models in the set (Burnham and  
319 Anderson 2002). In a Bayesian framework, the quantity is the frequency of a given model in the  
320 posterior distribution which is proportional to the posterior probability of the model given the  
321 observed data (Green 1995). Both the rjMCMC utilized by BAMM and model averaging  
322 approach described here have the same ultimate goal and allow us to investigate similar  
323 questions. Given the recent popularity of rjMCMC approaches in phylogenetics, it seems natural  
324 that tests of state-dependent diversification using likelihood should focus on parameter estimates  
325 while incorporating the contribution of each model to explain the observed data and avoid the  
326 pitfalls of model testing.

### 327 **Linking “hidden” states to geographic range evolution and diversification**

328 The dispersal-extinction-cladogenesis models (DEC; Ree and Smith 2008) as well as  
329 DEC+J (“jump dispersal”; Matze 2014) are popular frameworks for studying geographic range  
330 evolution using a phylogenetic-based approach. They are different from SSE models in that they  
331 are standard trait evolution models -- that is, the likelihood *only* reflects the evolution of ranges  
332 and the tree is considered fixed. Recently, Ree and Sanmartín (2018) raised concerns with the  
333 limitations of DEC and DEC+J models. Since the probability of the tree is not part of the DEC  
334 likelihood, cladogenetic events are independent of time, which produces odd behaviors in the  
335 parameter estimates, especially when jump dispersal events are allowed (Ree and Sanmartín  
336 2018). A straightforward way to alleviate this issue, as mentioned by Ree and Sanmartín (2018),  
337 is to simply apply geographic state speciation and extinction models (GeoSSE; Goldberg et al.  
338 2011) to study range evolution. Instead of optimizing ancestral areas conditioned on the nodes of  
339 a fixed tree, the GeoSSE model incorporates the tree into the likelihood and has a parameter for  
340 the rate of cladogenetic speciation.

341 Adopting an SSE-based framework to understand geographic range evolution is naturally  
342 burdened with respect to comparing complex models to “trivial” nulls and accounting for  
343 “hidden” variation among observed states. In our view, the concept of hidden variation seems the  
344 most relevant when investigating geographic range evolution. Due to the need for reducing  
345 geographical variation into coarsely defined discrete areas, parameter estimates could be strongly

346 impacted by heterogeneous features across the landscape not captured by this categorization. A  
347 good example of the potential for hidden variation in range evolution comes from studies of  
348 diversity dynamics between tropical and temperate regions, which are often defined simply by  
349 latitude (e.g., tropical for  $|\text{latitude}| < 23.5$  degrees; Rolland et al. 2014). Such categorization  
350 necessarily overlooks the heterogeneity present in the tropics: some high elevation areas freeze,  
351 others do not; some areas are deserts and others are lush forests, etc. However, the ability for the  
352 data to “speak” to the rate variation within a given geographic area is not currently allowed  
353 within the existing GeoSSE framework. Below, we briefly demonstrate how the hidden Markov  
354 modelling (HMM) approach can easily be used for geographical state speciation and extinction  
355 models. However, this is just one example of the utility of HMM approaches in diversification  
356 models; HMM approaches can, and we argue should, be added as options to other diversification  
357 approaches.

358 *Geographic hidden state speciation and extinction model* -- The general form of the  
359 original GeoSSE model determines the diversification dynamics within, and transitions between,  
360 two discrete regions  $0$  and  $1$ . Under this model (see Figure 3), a species observed at the present  
361 ( $t=0$ ) can be “endemic” to either area  $0$  or  $1$ , or has persistent populations in both  $0$  and  $1$ ,  
362 referred to hereafter as the  $01$  range (i.e., “widespread”). Similarly to the DEC model, range  
363 evolution occurs in two distinct modes. First, ranges can expand or contract along the branches  
364 of the phylogeny through anagenetic change. Range expansions are based on state transitions  
365 from  $0$  to  $01$  and  $1$  to  $01$ , which are parameterized in the model as the per-lineage “dispersal”  
366 rates,  $d_0$  and  $d_1$ , respectively. Range contractions, on the other hand, describe the reverse process  
367 of transitions from  $01$  to  $1$  and  $01$  to  $0$ , which are the per-lineage rates of range contraction,  $x_0$   
368 and  $x_1$ , respectively (also referred as “extirpation” rates). The second mode of range evolution  
369 occurs as a product of the speciation process (i.e., cladogenesis), particularly with respect to  
370 speciation events breaking up widespread ranges into various combinations of descendant areas.  
371 The area-specific rates of “within-region” speciation are parameterized as  $s_0$  and  $s_1$ , whereas the  
372 “between-region” rate of speciation is denoted by  $s_{01}$ . We will refrain from describing the  
373 mathematical formulation of this particular model, as these are described in detail elsewhere  
374 (Goldberg et al. 2011, Goldberg and Igcic 2012). We do note, however, that our notation for the

375 observed areas differs from Goldberg et al. (2011) in order to be consistent with previous work  
376 on incorporating hidden states into -SSE models (see Beaulieu and O’Meara 2016).

377 In order to apply the hidden Markov modelling (HMM) to GeoSSE for the simplest case  
378 of two hidden states, we replicate the original model across hidden states  $A$  and  $B$ . We  
379 re-parameterize the model to include six distinct speciation rates,  $s_{0A}$ ,  $s_{1A}$ ,  $s_{01A}$ ,  $s_{0B}$ ,  $s_{1B}$ , and  $s_{01B}$ ,  
380 and four distinct extinction rates,  $x_{0A}$ ,  $x_{1A}$ ,  $x_{0B}$ , and  $x_{1B}$ , allowing for two distinct net diversification  
381 rates within each range (Figure 3). Likewise, dispersal rates from area  $0$  (or  $1$ ) into  $01$  also show  
382 separate rates for each hidden state, parametrized as  $d_{0A}$  and  $d_{0B}$  for area  $0$  or  $d_{1A}$  and  $d_{1B}$  for area  
383  $1$ . Shifts between the hidden states within a geographic range are modelled with the transition  
384 rate  $q$  following the same approach described by Beaulieu and O’Meara (2016), as does the  
385 inference of changes in the hidden state within each range. Herein we focus our simulation tests  
386 and empirical analyses on a spatial structure that contains only two geographical areas, however,  
387 just like the DEC model, our GeoHiSSE model can contain an arbitrarily large state space.

388 The GeoSSE model set must also be expanded to include a more complex and less trivial  
389 set of “null” models to compare against those that assume some form of area-dependent  
390 diversification (referred to here as ADDiv). Recently, Huang et al. (2017) extended the CID  
391 approach to obtain an area-independent model (referred to hereafter as, AIDiv) for use in model  
392 comparisons against GeoSSE. The AIDiv model of Huang et al. (2017) replicates the GeoSSE  
393 model across two hidden states,  $A$  and  $B$ , similar to our GeoHiSSE model described above.  
394 However, here the diversification rates are constrained to be equal in each of the hidden states  
395 such that  $s_{0A}=s_{1A}=s_{01A}$ ,  $x_{0A}=x_{1A}$ ,  $s_{0B}=s_{1B}=s_{01B}$ , and  $x_{0B}=x_{1B}$  (Figure 3). There is also a global  
396 transition rate (e.g.,  $d_{0A \rightarrow 0B}$ ) which accounts for transitions among the different hidden states  
397 within each range and disallows dual transitions between areas and hidden states (i.e.,  $d_{0A \rightarrow 1B}=0$ ).  
398 We expand the AIDiv model to allow geographic ranges to be associated with as many as five  
399 different hidden states (i.e.,  $h \in A, B, C, D, E$ ). The AIDiv model that contains two hidden states  
400 is equivalent to the model of Huang et al (2017). It should be noted that this model contains only  
401 two diversification rate categories, which makes the AIDiv model slightly less complex than the  
402 original GeoSSE model (which has three). In any event, the purpose of these models is to prevent  
403 spurious assignments of diversification rate differences between observed areas in cases where



404 diversification is affected by other traits. Finally, an AIDiv model with five hidden states  
405 contains as many as 10 free diversification parameters and, importantly, equals the complexity in  
406 our GeoHiSSE model.

407 *Further model expansions* -- We also relaxed and tested the behavior of two important  
408 model constraints within the GeoSSE framework. First, we wondered whether constraining range  
409 contraction and lineage extinction to be the same could be too restrictive, particularly when the  
410 ranges under consideration represent large geographical areas. Under the original GeoSSE model  
411 there are two parameters,  $d_{0l \rightarrow 0}$  and  $d_{0l \rightarrow 1}$ , which denote local range contraction that are linked to  
412 extinction rates of the endemics,  $x_0$  and  $x_1$  (Figure 3). However, consider a scenario where  
413 lineages have originated in a temperate region and possess a suite of traits that reduce extinction  
414 rates in this area. Movements into the tropical regions require not just getting there, but also  
415 being able to compete within this new environment. Recent attempts to disperse into the tropical  
416 zone by those lineages on the boundary separating the two areas can persist there for a time, but  
417 might eventually go locally extinct in the tropical portion. The constraint of the rate of range  
418 contraction always equalling the extinction rate of endemics prevents the detection of such  
419 dynamics. Furthermore, this will necessarily increase estimates of per-lineage extinction rates for  
420 the tropical region as a whole because of the link between range contraction and lineage  
421 extinction present in the original GeoSSE model (Goldberg et al. 2011). Here we extended the  
422 model by separating the rate of range contraction from the process of lineage extinction (see  
423 more details in Figure 3 and *Supplementary material*). More broadly, we refer to this class of  
424 models as “GeoHiSSE+extirpation” or “GeoSSE+extirpation” to represent models with and  
425 without hidden states, respectively. Removing this constraint effectively increases the number of  
426 state “transition rates” in the model. Teasing apart the effect of range reduction and extinction of  
427 endemics will likely require phylogenetic trees of large size. For instance, our simulations show  
428 parameter estimates for the hiGeoSSE+extirpation model are adequate with trees of 500 species  
429 (see *Supplementary material*).

430 Second, we included a complementary set of models (both AIDiv and ADDiv) that  
431 removed the cladogenetic effect from the model entirely. These models assume that lineage  
432 speciation has no direct impact on range evolution, such that all changes occur along the

433 branches (i.e., anagenetic change). This requires the addition of a per-lineage rate of extinction  
434 and speciation for lineages in the widespread range ( $x_{0I}$  and  $s_{0I}$ , respectively) as well as range  
435 contraction being distinct from the extinction of endemics. In the absence of a hidden state, this  
436 is effectively a three-state MuSSE model (FitzJohn 2012) with transition matrix constrained such  
437 that a shift between ranges  $0$  and  $I$  has range  $0I$  as the intermediary state. Here we also expand  
438 this particular MuSSE-type model to allow for up to five hidden states and can be used to test  
439 hidden state character-dependent or character-independent diversification models, depending on  
440 how the different diversification parameters are set up (Table 1). In general, we include this  
441 particular set of models as a way of acknowledging that we really never know the “true” history  
442 of the characters or areas we observe. Therefore, there should be some way for the data to speak  
443 to scenarios that may be outside our *a priori* expectations with respect to geographic state  
444 speciation and extinction. Again, our argument follows the same logic as with the usage of  
445 hidden state SSE models. If a cladogenetic model is not the most adequate for our empirical data  
446 set, it is best to allow for a non-trivial “null” model (i.e., the anagenetic model) than to force a set  
447 of inadequate cladogenetic models to fit such data set. We refer to this class of models hereafter  
448 as “Anagenetic”.

449 *Simulations* -- We performed extensive simulations to test the behavior of the hidden state  
450 geographic state speciation and extinction (GeoHiSSE), in addition to our other model  
451 expansions. We evaluated models of area-dependent and independent diversification under a  
452 series of scenarios, including unequal frequencies between observed ranges and absence of  
453 cladogenetic events. We have relegated many of the details and tests to the Supplemental  
454 Materials. Briefly, we generated 100 trees containing 500 taxa for each simulation scenario.  
455 Thus, our results are relevant to trees of similar size or larger and we strongly suggest users to  
456 perform power analyses when using smaller trees. All analyses were carried out using new  
457 functions provided in the R package *hisse* (Beaulieu and O’Meara 2016). Code to replicate the  
458 simulations are also available on the *Supplementary material*.

459 For the first simulation scenario (scenario A), we simulated data using a homogeneous  
460 rate GeoSSE model with the speciation rate for one of the endemic areas (area  $I$ ) set to be two  
461 times faster than the other two possible areas ( $I$  and  $0I$ ). This represented the simplest case for

462 which the original GeoSSE model is known to be adequate (Goldberg et al. 2011). It also  
463 allowed us to test whether models with multiple hidden rate classes exert undue weight when  
464 rate heterogeneity is not actually present in the data. We found that even when the model set  
465 included a broad array of complex models, most of the model weight across all replicates for  
466 scenario A goes to the generating model (model 2; Figure S8). Furthermore, even when net  
467 diversification rates between endemic ranges are averaged across all models our estimates were  
468 congruent with the true values (Figure 4A). When we expressed speciation and extinction rates  
469 in terms of turnover rates (i.e.,  $s_i + x_i$ ) and extinction fraction (i.e.,  $x_i/s_i$ ), the rate estimates for  
470 each node in the tree are also centered on the true parameter values, independent of tree height  
471 (Figure S5).

472 In the second and third scenarios (scenarios B and C), we introduced three and five  
473 range-independent diversification regimes, respectively. The transition between diversification  
474 rate classes followed a meristic Markov model to emulate gradual changes in diversification  
475 rates (Figure S1). In both cases, we did not detect any meaningful differences in the net  
476 diversification rates between endemic areas (Figures 4B-C and S3), and the parameter estimates  
477 computed for each node and tip of the phylogeny are centered on the true values. Thus, our  
478 results show that area-independent GeoHiSSE models can accommodate the rate heterogeneity  
479 in the simulated trees without evoking an area-dependent diversification process when none was  
480 present. We do note, however, that even when we reduced the model set and fit only simple  
481 homogeneous GeoSSE models to the same data, there is an interesting effect in that the  
482 parameter estimates averaged across all models would still lead to an area-independent  
483 diversification interpretation (see *Appendix 2*).

484 Simulation scenario D represented an instance of the area-dependent model (ADDiv)  
485 model in which geography has an important effect on diversification across the phylogeny, but  
486 diversification rates vary within each range as a function of some unobserved “hidden” trait. The  
487 frequency of each hidden rate class stochastically varies across simulation replicates, and,  
488 therefore, there is no single true value for diversification rates. Nevertheless, results showed that  
489 GeoHiSSE was able to recover the correct direction in the relationship between net  
490 diversification rates of endemic areas in the presence of heterogeneity (Figures 4D, S5 and S6D).

491 We also studied two extreme cases with the objective of identifying odd behaviors when  
492 simulating data sets where 1) widespread ranges are rare or absent in extant species, and where  
493 2) the evolution of areas are not tied to cladogenetic events. Under the original GeoSSE model,  
494 lineages need to pass through the widespread state before transitioning between endemic areas. If  
495 extant widespread lineages are rare or absent, the information to infer cladogenetic and  
496 dispersion events can become limited. To study this effect we first simulated datasets with  
497 widespread lineages as being rarely observed at the tips (see scenario E in Table S1). Results  
498 showed that low frequency of widespread lineages does not prevent our set of models from  
499 reaching meaningful estimates using model-averaging (Figure 5E). Alternatively, we simulated  
500 the case of jump dispersal events (i.e., direct transitions between endemic distributions). For this  
501 we used a GeoSSE model to simulate the data, but we allowed lineages to disperse between  
502 endemic areas without becoming widespread first (scenario F). [Note that none of the 18 models  
503 we used to estimate parameters throughout this study allow for any instance of jump dispersal  
504 events.] Our results showed no evidence for a meaningful bias in parameter estimates for both  
505 area-dependent diversification rates or speciation rates associated with cladogenetic events on  
506 widespread lineages (Figure 5F). In summary, our approach of model-averaging across a large  
507 set of candidate models does not appear sensitive to rare extant widespread areas.

508 Finally, we explored the extreme possibility that the widespread range was never a part of  
509 the history of the clade (scenario G). When fit to our model set, the absence of widespread areas  
510 among the extant species produces estimates of the rates of cladogenetic speciation ( $s_{AB}$ ) that are  
511 highly uncertain (Figure 5G). These estimates are orders of magnitude higher than the rates of  
512 speciation associated with endemic regions. In contrast, estimates for the relative difference in  
513 net diversification rates between endemic areas did not show a strong bias (Figure 5G). This  
514 suggests that poor estimates of cladogenetic speciation would not strongly bias our conclusions  
515 about range-dependent diversification rates.

516 All previous scenarios assumed that cladogenetic events were important in the  
517 evolutionary history of the lineages. In order to consider the performance of the model when this  
518 is not the case, we generated datasets with transitions between areas restricted only to anagenetic  
519 dispersal events along the branches of the tree. The estimated difference in rates of

520 diversification between endemic areas is larger than observed in any other simulation scenario  
521 (Figure 5H). Moreover, the absence of cladogenetic events makes estimates of cladogenetic  
522 speciation ( $s_{AB}$ ) uncertain, although raw parameter values are within the same order of magnitude  
523 of the true rates of diversification across the tree (grey lines in Figure 5H).

524 On the whole, our extensive simulation study shows that parameter estimates averaged  
525 across 18 models of area-independent and area-dependent evolution are robust to a wide variety  
526 of macroevolutionary scenarios likely to be observed in empirical datasets. We also show that  
527 important violations of the expected type of data modelled with GeoSSE, such as absence of  
528 widespread lineages or cladogenetic speciation events, are not enough to significantly hinder our  
529 interpretation of the evolutionary history of the group, even when there is large ambiguity in the  
530 estimate for some parameters of the model.

### 531 **Empirical example: Hemisphere-scale differences in conifer diversification**

532 A further question is the performance of the GeoHiSSE model, as well as our extensions  
533 to the original GeoSSE model, in an empirical setting, where we do not know the generating  
534 model, and the tree and area designations could contain unforeseen errors or problematic and/or  
535 conflicting signals in the data. For these purposes, we focus our analyses on the evolutionary  
536 dynamics of movements between Northern and Southern Hemisphere conifers. There is evidence  
537 that the turnover rate — defined here as speciation + extinction rate — is generally higher for  
538 clades found exclusively in the Northern Hemisphere compared to clades found almost  
539 exclusively in the Southern Hemisphere (Leslie et al. 2012). The falling global temperatures  
540 throughout the Cenozoic, and concomitant movements of several major landmasses northwards,  
541 facilitated the emergence of colder, drier, and strongly seasonal environments within Northern  
542 Hemisphere regions (e.g., Zanzani et al. 2007, Eldrett et al. 2009). This may have led to  
543 widespread extinction of taxa unable to survive in such environments and expansion of taxa able  
544 to thrive there (perhaps through isolated populations surviving to become new species rather than  
545 go extinct due to competition). The net effect across the clade would be an increase in speciation  
546 and extinction rates. Furthermore, the repeated cycles of range expansion and contraction due to  
547 glacial cycles would also promote isolation of populations leading both to speciation (due to

548 allopatry), and possibly rapid extinction (due to small population size). The Southern  
549 Hemisphere, on the other hand, has maintained milder environments scattered throughout the  
550 region (e.g., Wilford and Brown 1994, McLoughlin 2001). It is important to note that these  
551 conclusions were supported by comparisons of branch length distributions and diversification  
552 models applied to various clades independently, which indicated heterogeneity among the  
553 taxonomic groups tested (see Leslie et al. 2012).

554 Using the expanded GeoSSE framework, we re-examined the hemisphere diversification  
555 differences within conifers proposed by Leslie et al. (2012). We combined geographic locality  
556 information from GBIF with an updated version of the dated conifer tree from Leslie et al.  
557 (2018) that improves taxon sampling relative to the analysis of Leslie et al. (2012). This new  
558 phylogeny contains 578 species, representing around 90% of the recognized extant diversity. We  
559 considered any locality having a maximum and minimum latitude  $>0$  degrees as being Northern  
560 Hemisphere,  $<0$  as Southern Hemisphere, and species with a maximum latitude  $>0$  and a  
561 minimum latitude  $<0$  were considered “widespread”. Such strict thresholds in latitude used to  
562 define ranges provide the ideal scenario in which hidden states may play an important role in  
563 understanding the diversification dynamics across the clades. Finally, we pruned the Pinaceae  
564 from our analysis and focus only on movements within the Cupressophyta, which includes the  
565 Cupressales (i.e., cypresses, junipers, yews, and relatives) and the Araucales (i.e., *Araucaria*,  
566 *Agatha*, podocarps, and relatives). The decision to remove Pinaceae from our analysis was based  
567 on the uncertain relationship of Gnetales to conifers. There remains the possibility that Gnetales  
568 is sister to conifers as a whole (e.g., the “Gnetifer” hypothesis; Chaw 1997, Burleigh and  
569 Mathews 2007), though most recent sequence analyses support Gnetales as sister to Pinaceae  
570 (e.g., the “Gnepine” hypothesis; Mathews 2006, Mathews 2009, Zhong et al. 2010). For these  
571 reasons, we focus our analyses on the Cupressophyta to ensure that our analyses reflect  
572 geographic range evolution within a monophyletic group.

573 Our final data set consisted of 325 species, with 146 species designated as Northern  
574 Hemisphere, 143 designated as Southern Hemisphere, and the remaining 36 species currently  
575 persisting in both areas. Our model set included the 18 models described in Table 1 and used in  
576 our simulations, as well as an additional 17 models. Briefly, we included AIDiv models that

577 ranged from 2-5 hidden states rather than just those that equal the number of parameters in the  
578 ADDiv models (i.e., AIDiv models consisting of 3 and 5 hidden states), various MuSSE-type  
579 models that allowed and disallowed range contraction to be separate from lineage extinction, and  
580 a particular set of MuSSE-type models that disallowed speciation and extinction (i.e., the rates  
581 were set to zero) in the widespread regions to better mimic *anagenetic-only* range evolution. The  
582 entire set of models tested and their number of free parameters are described in Table S2.

583 The turnover rate differences, even after accounting for hidden states and the possibility  
584 of heterogeneity in area-independent diversification, supported the original findings of Leslie et  
585 al. (2012). That is, Northern Hemisphere species across Cupressophytes exhibited higher  
586 turnover rates relative to species occurring in the Southern Hemisphere (Figure 6). The majority  
587 of the model weight is comprised of estimates from three models (models 4, 10, and 32 described  
588 in Table 1 and Table S2), all of which assume a hidden state and character-dependent  
589 diversification, but differ in whether cladogenetic events have occurred or whether range  
590 contraction is separate from lineage extinction. The inference of a hidden state also implied that  
591 differences in the turnover rate were also clade-specific. Indeed, differences in the turnover rates  
592 within the Northern Hemisphere Cupressales (i.e., Taxaceae+Cupressaceae) have a turnover rate  
593 that is nearly 3 times higher than Southern Hemisphere species. Within the Araucariales (i.e.,  
594 Araucariaceae+Podocarpaceae) the Northern Hemisphere rate is only 1.5 times higher than the  
595 species occurring in the Southern Hemisphere. Similarly, turnover rate is meaningfully higher in  
596 Southern Hemisphere Araucariales (0.152 events Myr<sup>-1</sup>) relative to the turnover rates among  
597 Southern Hemisphere members of the Cupressales (0.087 events Myr<sup>-1</sup>). Turnover rates are also  
598 higher among Northern Hemisphere species of Cupressales than Northern Hemisphere species of  
599 Araucariales, although these differences do not appear to be very meaningful (0.22 vs. 0.20  
600 events Myr<sup>-1</sup>).

601 In cases where diversification rates (or any other rate of interest) are always higher in one  
602 particular observed state than the other for any hidden state, interpretation of the results is fairly  
603 straightforward (e.g., Figure 6). Mapping the model-averaged diversification rates to the  
604 phylogenetic tree can also provide important, and often insightful, phylogenetic context to  
605 among species variation in parameter estimates. However, in some instances, ignoring rate



606 differences between combinations of observed and hidden traits could be problematic. Whether  
607 or not one observed state leads to higher diversification rates than the other could depend on the  
608 magnitude of the rate differences and how much time is spent in each hidden state -- that is,  
609 when the rate of diversification for  $0A > 1A > 1B > 0B$  the average mean rate for  $0$  could be  
610 equal, higher than, or lower than the rate for state  $1$ .

611 As a solution to this, we recommend model-averaging the “effective trait ratio”, which is  
612 the expected proportion of each observed state given the estimated parameters, tree depth, and  
613 the root weights under each of the models in the set (see *Appendix 1*). This provides an intuitive  
614 complement to examining just rate differences among observed states. In other words, even in  
615 cases where  $0A > 1A > 1B > 0B$ , and where the diversification rate of state  $0$  is more or less the  
616 same as state  $1$ , we could still find that, say, 75% of species are expected to be in state  $0$  due to  
617 the interaction with the hidden character. Note that this may differ radically from the empirical  
618 frequency, which is based on one realization of the process. Perhaps an unlikely series of  
619 changes early in the tree led to more taxa in state  $1$  than would be expected. Likewise, under a  
620 standard BiSSE analysis, it is possible to have more taxa in state  $1$  even if the net diversification  
621 rate in state  $1$  and transition rate to state  $1$  are lower than the equivalent rates for  $0$ . Given this  
622 scenario, one should conclude that there is signal for a trait-dependent process with observed  
623 state  $0$  having a positive effect on diversification, despite the lack of a consistent direction in the  
624 difference between hidden classes of observed traits. In the case of Cupressophytes, the  
625 model-averaged ratios indicated that roughly 52.3% ( $\pm 9.6\%$ ) of species are expected to occur in  
626 the Southern Hemisphere, with 35.4% ( $\pm 12.9\%$ ) of conifers are expected to be in the Northern  
627 Hemisphere, and 12.3% ( $\pm 4.4\%$ ) of the species widespread across both regions. These  
628 expectations are largely congruent with the estimates of turnover rates between Northern and  
629 Southern Hemisphere, where the increased “boom and bust” dynamics in the Northern  
630 Hemisphere produces diversity within the region at much lower levels than in the Southern  
631 Hemisphere.

632 **Caveats**

633         The GeoHiSSE family of models are reasonable approaches for understanding  
634 diversification when there can be many processes at play. However, it is important that we  
635 emphasize that, like all models, they are far from perfect. First, the hidden traits evolve under a  
636 continuous time Markov process, which is reasonable for heritable traits that affect  
637 diversification processes. Of course, not all heterogeneity arises in such a way. For instance,  
638 when an asteroid impact throws up a dust cloud, or causes a catastrophic fire, every lineage alive  
639 at that time is affected simultaneously. Their ability to survive may come from heritable factors,  
640 but the sudden shift in diversification caused by an exogenous event like this appears suddenly  
641 across the tree, in a manner not yet incorporated in these models. Similarly, a secular trend  
642 affecting all species is not part of this model, but is in others (Morlon et al. 2011), and they also  
643 do not incorporate factors like a species “memory” of time since last speciation (Alexander et al.  
644 2015), or even a global carrying capacity for a clade that affects the diversification rate (Rabosky  
645 and Glor 2010). These models require large numbers of taxa to be effective. Investigating the  
646 evolution of compelling but small clades like the great apes, baleen whales, or the Hawaiian  
647 silverswords can be attempted with these approaches, but results are likely to be met with fairly  
648 uncertain parameter estimates. It is possible to run these approaches over a cloud of trees. This  
649 will not compensate for biases or errors in the trees, such as if trees were inferred using a Yule  
650 prior and lack enough information to overwhelm the prior, if sequencing errors lead to overly  
651 long terminal branches, or if reticulate evolution is present and not taken into account. Most of  
652 these caveats are not limited to HMM models of diversification, but this reminder may serve to  
653 reduce overconfidence in results.

654 **Conclusions**

655         In practice, SSE models are generally only considered in a hypothesis rejection  
656 framework, namely, reject a null model where there is no trait-dependent diversification and thus  
657 accept an alternate model where rates depend on traits. The term “reject” can mean formal  
658 rejection using a likelihood ratio test, but it often takes the form of selecting the alternate model  
659 under AIC (despite warnings from Burnham and Anderson 2002). Rabosky and Goldberg (2015)

660 vividly showed problems with BiSSE when interpreted this way. While accurately critiquing  
661 how scientists use BiSSE models, their results point more to deficiencies in how we biologists  
662 use statistics rather than a particular problem with the SSE models *per se* (see Beaulieu and  
663 O’Meara 2016).

664         As scientists, we have all learned to recognize and worry about Type I errors, and so it is  
665 not surprising that this has remained the *status quo* when examining model behavior. In many  
666 cases reviewers may insist upon testing for the “best” model as a confirmatory approach, even  
667 when, as we show here, model-averaging has good performance and is robust to deviations from  
668 model assumptions (see similar comment on reviewer insistence in Ree and Sanmartín 2018).  
669 But, if we are to proceed down this road with SSE models, a model where the trait *and* the tree  
670 both evolved under constant rates of speciation and extinction and, sometimes, even under  
671 constant state transition rates is *not* the “null” model. Shifts in rates of diversification are  
672 ubiquitous across the tree of life for many reasons (mass extinctions, adaptive radiations,  
673 changing biogeography, available niches, etc.) and it is a safe bet to assume nearly any empirical  
674 tree will not show perfectly constant speciation and/or extinction rates. In the case of an  
675 empirical tree with trait-independent diversification, the null model (of constant rates for  
676 everything) and the alternative model (that traits affect diversification) are both wrong. So, which  
677 model should a good test choose?

678         In our view, even when presented with a equally complex alternative, the focus on model  
679 rejection still remains problematic. In certain areas of biology, we seem to stop after rejecting a  
680 null model that we already knew was false, though to be fair, of course, it is useful to get  
681 information about whether or not an effect might be present. But scientists should go beyond this  
682 to actually look at parameter estimates. Suppose we find the diversification rate of red flowers  
683 are higher than yellow flowers. Is it 1% higher, or is it 300% higher? The answer could have  
684 biologically very different implications, to the extent that rejecting or not the null model becomes  
685 largely irrelevant. Such concerns are much more common in other applications, particularly with  
686 linear regression models. However, the same care of checking how well the regression line  
687 passes through the data points and interpreting  $R^2$ , among other tests, have counterparts in  
688 phylogenetic comparative models and are equally relevant.

689           Here we show that hidden state modelling (HMM) is a general framework that has the  
690 potential to greatly improve the adequacy of any class of SSE models. The inclusion of hidden  
691 states are a means for testing hypotheses about unobserved factors influencing diversification in  
692 addition to the observed traits of interest. We emphasize, however, that they should not be treated  
693 as a separate class of SSE models, but instead viewed as complementary and should be included  
694 as part of a set of models under evaluation. They also represent a straightforward approach to  
695 incorporating different types of unobserved heterogeneity in phylogenetic trees than a simple  
696 single rate category model is able to explain. For example, our expanded suite of GeoSSE  
697 models allows accommodating heterogeneity in the diversification process as it relates to  
698 geographic areas. The GeoHiSSE models introduced here can be applied to study rates of  
699 dispersion and cladogenesis as well as to perform ancestral area reconstructions, thus being a  
700 suitable alternative to avoid the shortcomings of DEC and DEC+J models (Ree and Sanmartín  
701 2018). Moreover, the area-independent diversification models (AIDiv) appear adequate to  
702 explain shifts in diversification regimes unrelated to geographic ranges, and demonstrate that the  
703 area-dependent models (ADDiv) can successfully estimate the impact of geographic areas on  
704 diversification dynamics when such a signal is present in the data.

705           Many phylogenetic comparative methods have been under detailed scrutiny recently  
706 (e.g., Maddison and FitzJohn 2015, Rabosky and Goldberg 2015, Cooper et al. 2016a, Cooper et  
707 al. 2016b, Adams and Collyer 2017, Ree and Sanmartín 2018). This is certainly a worthy  
708 endeavor given that all models will fail under certain conditions, and some models have innate  
709 flaws that render them unwise to use. One response (e.g., Rabosky and Huang 2016, Rabosky  
710 and Goldberg 2017, Adams and Collyer 2017, Harvey and Rabosky 2018) has been to move to  
711 “semi-” or “non-parametric” approaches, some of which do incorporate models internally, but  
712 with an end result that is a non-parametric test. The issue with this is that they move entirely  
713 away from estimating parameters and the entire exercise becomes rejecting null models that we  
714 never really believed in. Such methods, in our view, provide very limited insights as they only  
715 show that the null model is wrong, with appropriate Type I error, which is not the same as  
716 showing the alternate is a correct model of the world. A more fruitful approach may be  
717 improving upon the existing models and better communicating when methods can and cannot be

718 applied (Cooper et al. 2016a). We should stop trying to prove that our data cannot be explained  
719 by naive, biologically-blind null models none of us believe and, instead, fit appropriate models  
720 such that we can learn about meaningful patterns and processes across the tree of life.

## 721 **References**

- 722 Adams, D.C., and M.L. Collyer. 2017. Multivariate phylogenetic comparative methods:  
723 evaluations, comparisons, and recommendations. *Syst. Biol.* 67:14–31.
- 724 Alexander, H.K., A. Lambert, and T. Stadler. 2015. Quantifying age-dependent extinction from  
725 species phylogenies. *Syst. Biol.* 65:35–50.
- 726 Alfaro, M.E., F. Santini, C. Brock, H. Alamillo, A. Dornburg, D. L. Rabosky, G. Carnevale, and  
727 L.J. Harmon. 2009. Nine exceptional radiations plus high turnover explain species  
728 diversity in jawed vertebrates. *Proc. Natl. Ac. Sci., USA* 106:13410–13414.
- 729 Beaulieu, J.M., and B.C. O’Meara. 2016. Detecting hidden diversification shifts in models of  
730 trait-dependent speciation and extinction. *Syst. Biol.* 65:583–601.
- 731 Berkson, J. 1938. Some difficulties of interpretation encountered in the application of the  
732 chi-square test. *J. Am. Stat. Assoc.* 33:526–536.
- 733 Burleigh, J.G. and S. Mathews. 2007. Assessing systematic error in the inference of seed plant  
734 phylogeny. *Int. J. Plant Sci.* 168:125–135.
- 735 Burnham, K.P., Anderson D.R. 2002. Model selection and multimodel inference: a practical  
736 information-theoretic approach. New York:Springer.
- 737 Butler, M.A., and A.A. King. 2004. Phylogenetic comparative analysis: a modeling approach for  
738 adaptive evolution. *Am. Nat.* 164:683–695.
- 739 Chaw, S.M., Zharkikh A., Sung H.M., Lau T.C., Li W.H. 1997. Molecular phylogeny of extant  
740 gymnosperms and seed plant evolution: analysis of nuclear 18S rRNA sequences. *Mol.*  
741 *Biol. Evol.* 14:56–68.
- 742 Cooper, N., G.H. Thomas, and R.G. FitzJohn. 2016a. Shedding light on the ‘dark side’ of  
743 phylogenetic comparative methods. *Methods Ecol. Evol.* 7:693–699.

- 744 Cooper, N., G.H. Thomas, C. Venditti, A. Meade, and R.P. Freckleton. 2016b. A cautionary note  
745 on the use of Ornstein Uhlenbeck models in macroevolutionary studies. *Biol. J. Linn.*  
746 *Soc.* 118:64–77.
- 747 Dalling, J.W., P. Barkan, P.J. Bellingham, J.R. Healey, and E.V.J. Tanner. 2011. Ecology and  
748 Distribution of Neotropical Podocarpaceae. L. Cernusak, B. Turner (Eds.), *Ecology of the*  
749 *Podocarpaceae in Tropical Forests*, Smithsonian Institution, Washington (2011), pp.  
750 43–56.
- 751 Eastman, J.M., M.E. Alfaro, P. Joyce, A.L. Hipp, and L.J. Harmon. 2011. A novel comparative  
752 method for identifying shifts in the rate of character evolution on trees. *Evolution*  
753 65:3578–3589.
- 754 Eldrett, J.S., D.R. Greenwood, I.C. Harding, and M. Huber. 2009. Increased seasonality through  
755 the Eocene to Oligocene transition in northern high latitudes. *Nature* 459:969–973.
- 756 FitzJohn, R.G. 2012. Diversitree: comparative phylogenetic analyses of diversification in R.  
757 *Methods Ecol. Evol.* 3:1084–1092.
- 758 FitzJohn, R.G., W.P. Maddison, and S.P. Otto. 2009. Estimating trait-dependent speciation and  
759 extinction rates from incompletely resolved phylogenies. *Syst. Biol.* 58:595–611.
- 760 FitzJohn, R.G. 2010. Quantitative traits and diversification. *Syst. Biol.* 59:619–633.
- 761 Goldberg, E.E., and B. Igić. 2012. Tempo and mode in plant breeding system evolution.  
762 *Evolution*, 66:3701–3709.
- 763 Goldberg, E.E., L.T. Lancaster, and R.H. Ree. 2011. Phylogenetic inference of reciprocal effects  
764 between geographic range evolution and diversification. *Syst. Biol.* 60:451–465.
- 765 Green, P. J. 1995. Reversible jump Markov chain monte carlo computation and Bayesian model  
766 determination. *Biometrika*, 82:711–732.
- 767 Harvey MG, Rabosky DL. 2018. Continuous traits and speciation rates: Alternatives to  
768 state-dependent diversification models. *Methods Ecol. Evol.* doi:  
769 10.1111/2041-210X.12949
- 770 Huang, D., E.E. Goldberg, L.M. Chou, and K. Roy. 2018. The origin and evolution of coral  
771 species richness in a marine biodiversity hotspot. *Evolution*, 72:288–302.

- 772 Kirk, R.E. 1996. Practical significance: A concept whose time has come. *Educ. Psychol. Meas.*  
773 56:746–759.
- 774 Kunzmann, L. 2007. Araucariaceae (Pinopsida): Aspects in palaeobiogeography and  
775 palaeobiodiversity in the Mesozoic. *Zool. Anz.* 246:257–277.
- 776 Leslie, A.B., J.M. Beaulieu, H.S. Rai, P.R. Crane, M.J. Donoghue, and S. Mathews. 2012.  
777 Hemisphere-scale differences in conifer evolutionary dynamics. *Proc. Natl. Ac. Sci.,*  
778 *USA.* 109:16217–16221.
- 779 Leslie, A.B., J.M. Beaulieu, G. Holman, C.S. Campbell, W. Mei, L.R. Raubeson, and S.  
780 Mathews. 2018. An overview of extant conifer phylogeny from the perspective of the  
781 fossil record. *Am. J. Bot.* In press.
- 782 Maddison, W.P., and R.G. FitzJohn. 2015. The unsolved challenge to phylogenetic correlation  
783 tests for categorical characters. *Syst. Biol.* 64:127–136.
- 784 Maddison, W.P., P.E. Midford, and S.P. Otto. 2007. Estimating a binary character's effect on  
785 speciation and extinction. *Syst. Biol.* 56:701–710.
- 786 Magnuson-Ford, K., and S.P. Otto. 2012. Linking the investigations of character evolution and  
787 species diversification. *Am. Nat.* 180:225–245.
- 788 Mathews, S. 2006. Phytochrome-mediated development in land plants: red light sensing evolves  
789 to meet the challenges of changing light environments. *Mol. Ecol.* 15:3483–3503.
- 790 Mathews, S. 2009. Phylogenetic relationships among seed plants: persistent questions and the  
791 limits of molecular data. *Am. J. Bot.* 96:228–236.
- 792 Matzke, N.J. 2014. Model selection in historical biogeography reveals that founder-event  
793 speciation is a crucial process in island clades. *Syst. Biol.* 63(6):951–970.
- 794 McLoughlin, S. 2001. The breakup history of Gondwana and its impact on pre-Cenozoic floristic  
795 provincialism. *Aust. J. Bot.* 49:271–300.
- 796 Morlon, H., T.L., Parsons, and J.B., Plotkin. 2011. Reconciling molecular phylogenies with the  
797 fossil record. *Proc. Natl. Ac. Sci., USA.* 08(39):16327-16332.
- 798 Nee, S., R.M., May, and P.H., Harvey. 1994. The reconstructed evolutionary process. *Philos.*  
799 *Trans. Royal Soc. B.* 344:305–311.



- 800 O'Meara, B.C., and J.M. Beaulieu. 2016. Past, future, and present of state-dependent models of  
801 diversification. *Am. J. Bot.* 103:1-4.
- 802 Pagel, M. 1994. Detecting correlated evolution on phylogenies: a general method for the  
803 comparative analysis of discrete characters. *Proc. Royal Soc. B.* 255:37–45.
- 804 Posada, D. 2008. jModelTest: phylogenetic model averaging. *Mol. Biol. Evol.* 25:1253–1256.
- 805 Rabosky, D. L. 2007. LASER: A Maximum Likelihood Toolkit for Detecting Temporal Shifts in  
806 Diversification Rates From Molecular Phylogenies. *Evol. Bioinform.* 2:247–250.
- 807 Rabosky, D.L. 2014. Automatic detection of key innovations, rate shifts, and  
808 diversity-dependence on Phylogenetic Trees. *PLoS ONE*, 9:e89543.
- 809 Rabosky, D.L., and R.E. Glor. 2010. Equilibrium speciation dynamics in a model adaptive  
810 radiation of island lizards. *Proc. Natl. Ac. Sci., USA.* 107:22178-22183.
- 811 Rabosky, D.L., and E.E. Goldberg. 2015. Model inadequacy and mistaken inferences of  
812 trait-dependent speciation. *Syst. Biol.* 64:340–355.
- 813 Rabosky, D.L., and E.E. Goldberg. 2017. FiSSE: A simple nonparametric test for the effects of a  
814 binary character on lineage diversification rates. *Evolution*, 71:1432–1442.
- 815 Rabosky, D.L., and H. Huang. 2016. A robust semi-parametric test for detecting Trait-Dependent  
816 diversification. *Syst. Biol.* 65:181–193.
- 817 Rabosky, D.L., and I.J. Lovette. 2008. Density dependent diversification in North American  
818 wood-warblers. *Proc. Royal Soc. B.* 275:2363-2371.
- 819 Ree, R.H., and I. Sanmartín. 2018. Conceptual and statistical problems with the DEC+J model of  
820 founder-event speciation and its comparison with DEC via model selection. *J. Biogeogr.*  
821 doi:10.1111/jbi.13173.
- 822 Ree, R.H., and S. Smith. 2008. Maximum likelihood inference of geographic range evolution by  
823 dispersal, local extinction, and cladogenesis. *Syst. Biol.* 57(1):4–14.
- 824 Rolland, J., F.L. Condamine, F. Jiguet, H. Morlon. 2014. Faster speciation and reduced extinction  
825 in the tropics contribute to the mammalian latitudinal diversity gradient. *PLoS Biology*,  
826 12:e1001775.
- 827 Schluter, D., T. Price, A.Ø. Mooers, and D. Ludwig. 1997. Likelihood of Ancestor States in  
828 Adaptive Radiation. *Evolution*, 51:1699–1711.

- 829 Stadler, T. 2011. Mammalian phylogeny reveals recent diversification rate shifts. *Proc. Natl. Ac.*  
830 *Sci., USA.* 108:6187–6192.
- 831 Wilford, G.E. and P.J. Brown. 1994. *History of the Australian Vegetation*, ed. R.S. Hill,  
832 Cambridge University Press, Cambridge, pp. 5-13.
- 833 Yang, Z., S. Kumar, and M. Nei. 1995. A new method of inference of ancestral nucleotide and  
834 amino acid sequences. *Genetics*, 141:1641–1650.
- 835 Yang, Z., and R. Nielsen. 2008. Mutation-Selection Models of Codon Substitution and Their Use  
836 to Estimate Selective Strengths on Codon Usage. *Mol. Biol. Evol.* 25:568–579.
- 837 Zanzazi, A., M.J. Kohn, B.J. McFadden, and D.O. Terry, Jr. 2007. Large temperature drop across  
838 the Eocene-Oligocene transition in central North American. *Nature*, 445:639–642.
- 839 Zhong, B., O. Deusch, V.V. Goremykin, D. Penny, P.J. Biggs, R.A. Atherton, S.V. Nikiforova,  
840 and P.J. Lockhart. 2010. Systematic error in seed plant phylogenomics. *Genome Biol.*  
841 *Evol.* 3:1340–1346.

842 **Appendix 1**

843 *Effective trait ratios under GeoHiSSE* -- We can use parameters estimated under a given model  
 844 to determine the expected frequency of each observed area and hidden state combination across a  
 845 long stretch of evolutionary time. These equilibrium frequencies are often used in a variety of  
 846 ways, most notably as weights in the likelihood calculation at the root (see Goldberg et al. 2011).  
 847 We rely on them to compliment the examination of rate differences among the observed ranges.  
 848 In the main text we describe a situation in which the rate of observed state  $0$  is more or less the  
 849 same as state  $1$ , but given the interaction with the hidden characters in the model we may find  
 850 that 75% of species are expected to be in area  $0$  over some specified length of evolutionary time.

851 We follow Maddison et al. (2007) and track the number of lineages in area  $0$ ,  $n_0$ , the  
 852 number of lineages in area  $1$ ,  $n_1$ , and the number of lineages in the widespread area  $01$ ,  $n_{01}$ , over  
 853 some length of evolutionary time,  $T$ . The index,  $i$ , denotes the possible hidden states ( $A, B, \dots, i$ )  
 854 that each observed state is associated. Given all the possible events that could occur across any  
 855 given interval of time, we obtain the expected number of species for each area through the  
 856 following ordinary differential equations:

857 
$$\frac{dn_{0i}}{T} = s_{0i}n_{0i} + s_{01i}n_{01i} + s_{0i}n_{01i} + d_{01i \rightarrow 0i}n_{01i} + \sum_{j \neq i} d_{0j \rightarrow 0i}n_{0j} - x_{0i}n_{0i} - d_{0i \rightarrow 01i}n_{0i} - \sum_{j \neq i} d_{0i \rightarrow 0j}n_{0i}$$

858 (1a)

859 
$$\frac{dn_{1i}}{T} = s_{1i}n_{1i} + s_{01i}n_{01i} + s_{1i}n_{01i} + d_{01i \rightarrow 1i}n_{01i} + \sum_{j \neq i} d_{1j \rightarrow 1i}n_{1j} - x_{1i}n_{1i} - d_{1i \rightarrow 01i}n_{1i} - \sum_{j \neq i} d_{1i \rightarrow 1j}n_{1i}$$

860 (1b)

861 
$$\frac{dn_{01i}}{T} = d_{0i \rightarrow 01i}n_{01i} + d_{0i \rightarrow 01i}n_{01i} \sum_{j \neq i} d_{0j \rightarrow 0i}n_{0j} - s_{01i}n_{01i} - d_{01i \rightarrow 0i}n_{01i} - d_{01i \rightarrow 1i}n_{1i} - \sum_{j \neq i} d_{01i \rightarrow 01j}n_{01i}$$

862 (1c)

863 Note that we use  $d_{01i \rightarrow 0i}$  and  $d_{01i \rightarrow 1i}$  to denote instances in which range contraction is separate  
 864 from lineage extinction,  $x_{0i}$  and  $x_{1i}$ . However, if the model assumes range contraction is  
 865 governed by the same parameter value as lineage extinction, then we simply set  $d_{01i \rightarrow 0i} = x_{1i}$  and  
 866  $d_{01i \rightarrow 1i} = x_{0i}$ . We also note that when there are no hidden states these equations reduce exactly to  
 867 the equilibrium frequencies under the original GeoSSE formulation. The initial conditions are set  
 868 according to the state at the root. In our case, as a means of accounting for the uncertainty in the  
 869 starting state we rely on the likelihood that each area gave rise to the data (FitzJohn et al. 2009).  
 870 Once the number of lineages are determined after a specified  $T$ , we then sum the frequencies for  
 871 each observed area across each hidden state and normalize them so that the observed area  
 872 frequencies sum to 1.

873 The above equations assume explicitly that the birth-death process directly impacts range  
 874 evolution through cladogenetic events, which are not allowed if the underlying model is a  
 875 MuSSE-type model. Thus, in the MuSSE-type case, we rely on the following ordinary  
 876 differential equations:

$$877 \quad \frac{dn_{0i}}{T} = s_{0i}n_{0i} + d_{01i \rightarrow 0i}n_{01i} + \sum_{j \neq i} d_{0j \rightarrow 0i}n_{0j} - x_{0i}n_{0i} - d_{0i \rightarrow 01i}n_{0i} - \sum_{j \neq i} d_{0i \rightarrow 0j}n_{0i} \quad (2a)$$

$$878 \quad \frac{dn_{1i}}{T} = s_{1i}n_{1i} + d_{01i \rightarrow 1i}n_{01i} + \sum_{j \neq i} d_{1j \rightarrow 1i}n_{1j} - x_{1i}n_{1i} - d_{1i \rightarrow 01i}n_{1i} - \sum_{j \neq i} d_{1i \rightarrow 1j}n_{1i} \quad (2b)$$

$$879 \quad \frac{dn_{01i}}{T} = s_{01i}n_{01i} + d_{0i \rightarrow 01i}n_{01i} + d_{0i \rightarrow 01i}n_{01i} + \sum_{j \neq i} d_{0j \rightarrow 01i}n_{0j} - x_{01i}n_{01i} + d_{01i \rightarrow 0i}n_{01i} - d_{01i \rightarrow 1i}n_{01i}$$

$$880 \quad - \sum_{j \neq i} d_{01i \rightarrow 01j}n_{01i} \quad (2c)$$

**Table 1** List of 18 fitted models. Columns show model category, model number, description of the model, and number of free parameters. Area-independent models (AIDiv) have no relationship between diversification rates and geographic areas. ‘full model’ indicates that all parameters of the model are free whereas ‘null model’ indicates that diversification and dispersion parameters are constrained to be equal among areas in the same hidden state category. If not ‘full model’ or ‘null model’, the description column lists the free parameters of the model. Models indicated with ‘+extirpation’ separate rates of range reduction from the extinction of endemic lineages.

| Category                                                                         | Model | Description                                                  | free parameters |
|----------------------------------------------------------------------------------|-------|--------------------------------------------------------------|-----------------|
| C<br>L<br>A<br>D<br>O<br>G<br>E<br>N<br>E<br>T<br>I<br>C                         | 1     | AIDiv - original GeoSSE, free dispersal                      | 4               |
|                                                                                  | 2     | original GeoSSE, full model                                  | 7               |
|                                                                                  | 3     | AIDiv - GeoHiSSE, 3 rate classes, null model                 | 9               |
|                                                                                  | 4     | GeoHiSSE, 2 rate classes, full model                         | 15              |
|                                                                                  | 5     | AIDiv - GeoHiSSE, 5 rate classes, null model                 | 13              |
|                                                                                  | 6     | AIDiv - GeoHiSSE, 2 rate classes, free dispersal             | 7               |
| C +<br>L E<br>A X<br>D T<br>O I<br>G R<br>E P<br>N A<br>E T<br>T I<br>I O<br>C N | 7     | AIDiv - GeoSSE+extirpation, free dispersal                   | 6               |
|                                                                                  | 8     | GeoSSE+extirpation, full model                               | 9               |
|                                                                                  | 9     | AIDiv - GeoHiSSE+extirpation, 3 rate classes, null model     | 11              |
|                                                                                  | 10    | GeoHiSSE+extirpation, 2 rate classes, full model             | 19              |
|                                                                                  | 11    | AIDiv - GeoHiSSE+extirpation, 5 rate classes, null model     | 15              |
|                                                                                  | 12    | AIDiv - GeoHiSSE+extirpation, 2 rate classes, free dispersal | 9               |
| A<br>N<br>A<br>G<br>E<br>N<br>E<br>T<br>I<br>C                                   | 13    | AIDiv - anagenetic GeoSSE, free dispersal                    | 6               |
|                                                                                  | 14    | anagenetic GeoSSE, full model                                | 10              |
|                                                                                  | 15    | AIDiv - anagenetic GeoHiSSE, 3 rate classes, null model      | 11              |
|                                                                                  | 16    | anagenetic GeoHiSSE, 2 rate classes, full model              | 21              |
|                                                                                  | 17    | AIDiv - anagenetic GeoHiSSE, 5 rate classes, null model      | 15              |
|                                                                                  | 18    | AIDiv - anagenetic GeoHiSSE, 2 rate classes, free dispersal  | 9               |

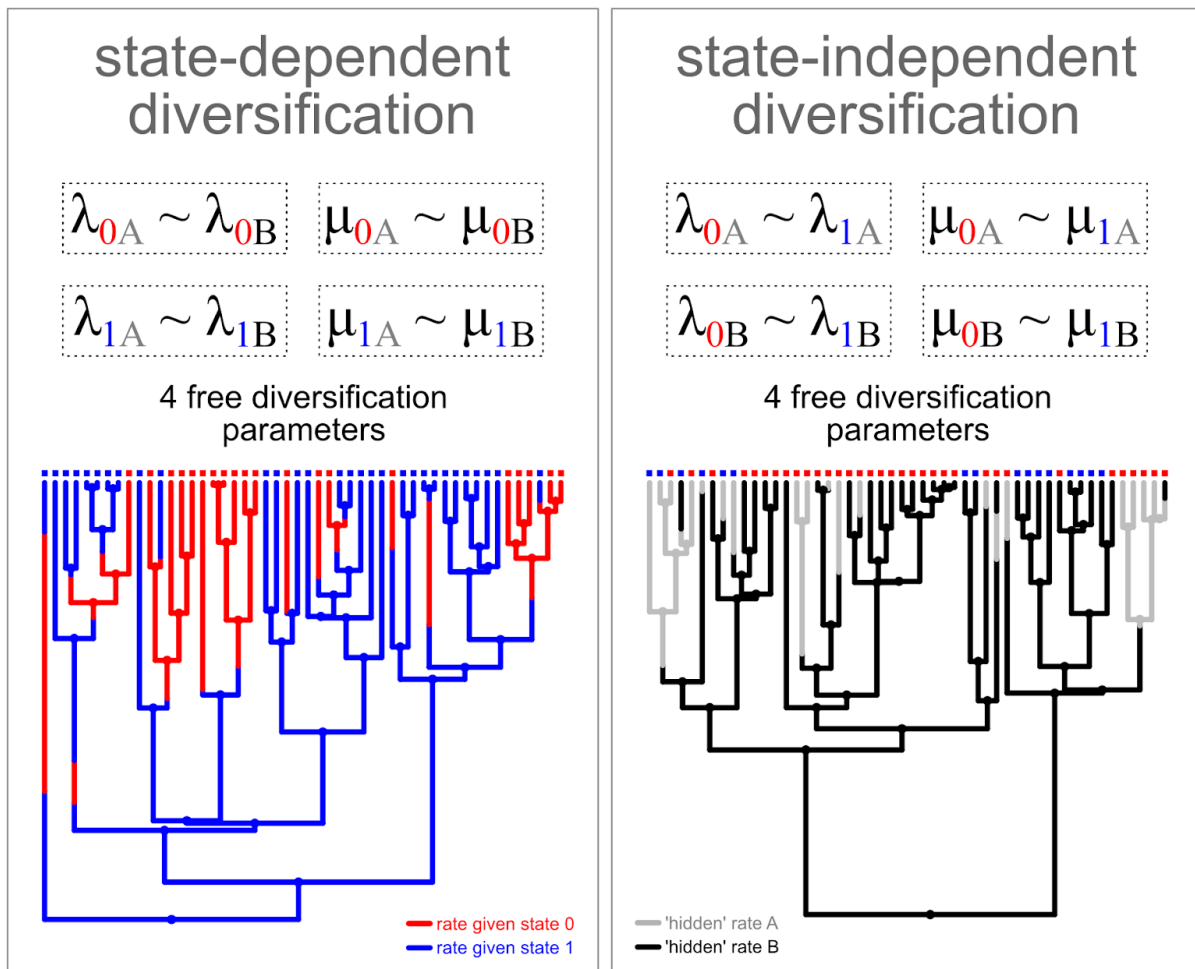

**Figure 1** Hidden state models provide a framework to solve the issue with false relationships between shifts in diversification rates and traits. Parameters linked by ‘~’ are constrained to share the same value. Left-side panel shows a case of state-dependent evolution. Here, shifts in rates of diversification in the tree are perfectly predicted by the transition between trait states 0 (red) and 1 (blue). Right-side panel shows state-independent shifts in diversification rates with respect to the focal trait (gray vs. black branches). Both models share the same number of free diversification parameters, but the variation among hidden states is partitioned differently. The state-independent model (right panel) allows for two diversification rate categories unrelated to the observed traits. An overly simplistic homogeneous rate model would be inadequate for either of these trees.

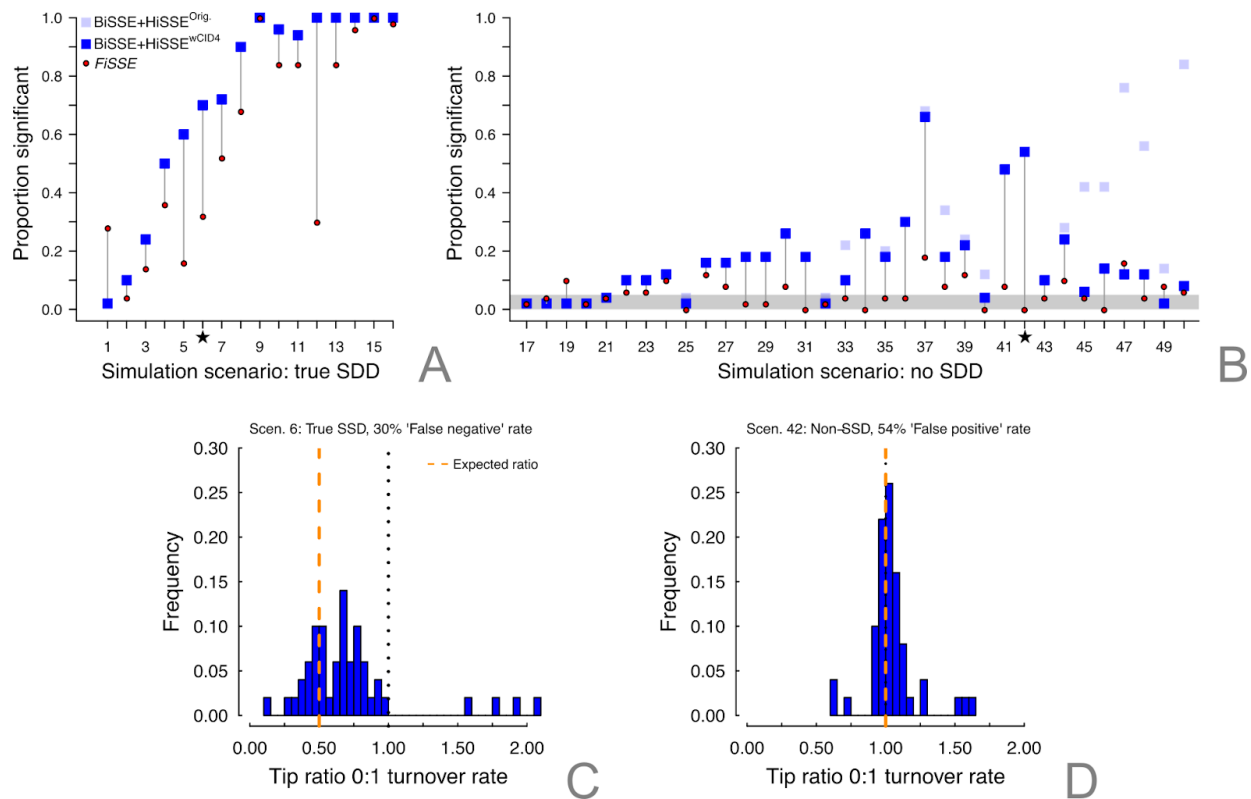

**Figure 2** Reanalysis of the Rabosky and Goldberg (2017) when the 4-state character independent model, CID-4, is included in the model set (dark blue boxes). When compared against the fit of BiSSE, CID-2, and HiSSE, the (A) power to detect the trait-dependent diversification remains unchanged. For the trait-independent scenarios (B), there is almost always a reduction in the “false positive” rate (as indicated by the difference in the position of the light blue and dark blue boxes), and in many cases the reduction is substantial. When we model-averaged parameter estimates of turnover from two scenarios, a true SSD scenario (C), where the HiSSE model set showed high “false negative” rates (i.e., failed to reject a trait-independent scenario), and a non-SSD scenario (D) which exhibited a 54% false-positive rate. In the case of the non-SSD scenario, it clearly shows that despite the poor performance of from a model rejection perspective, examining the the model parameters indicates that, on average, there are no differences in diversification rates among observed states. The dashed orange line represents the expected ratio to be compared against a ratio of difference in diversification rates between state 0 and 1 denoted by the dotted black line.



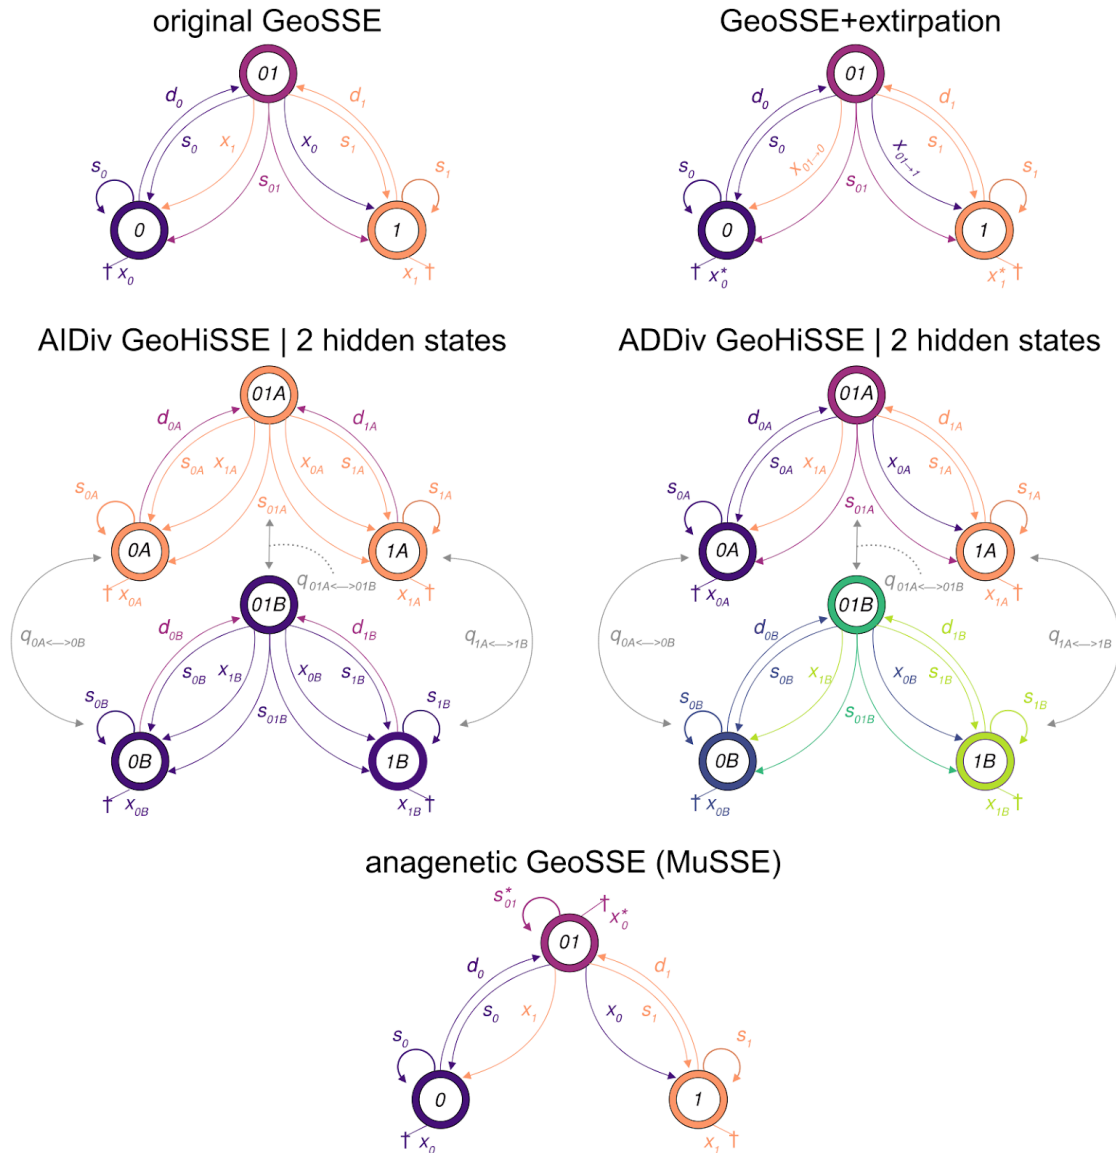

**Figure 3** The states and allowed transitions in the original GeoSSE model (Goldberg et al., 2011) and the model extensions described herein. The colors denote parameters that are associated with each character combination modelled as having their own unique set of diversification rate parameters. The GeoSSE+extirpation model separates rates of range reduction (e.g.,  $x_{01 \rightarrow 1}$ ) from the extinction of endemic lineages (e.g.,  $x_0$ ), but otherwise contains three unique sets of diversification parameters as in the original GeoSSE model. The area independent diversification (AIDiv) GeoHiSSE (denoted by two sets of diversification parameters shown in orange and purple) and the area dependent diversification (ADDiv) GeoHiSSE (denoted by six sets of diversification parameters shown in various colors) models can have 2 or more hidden states. Finally, the anagenetic GeoSSE model is a special case of the MuSSE model parameterized as to emulate the transitions allowed by the original GeoSSE model. Note that GeoSSE+extirpation as well as the anagenetic models can also support hidden states.

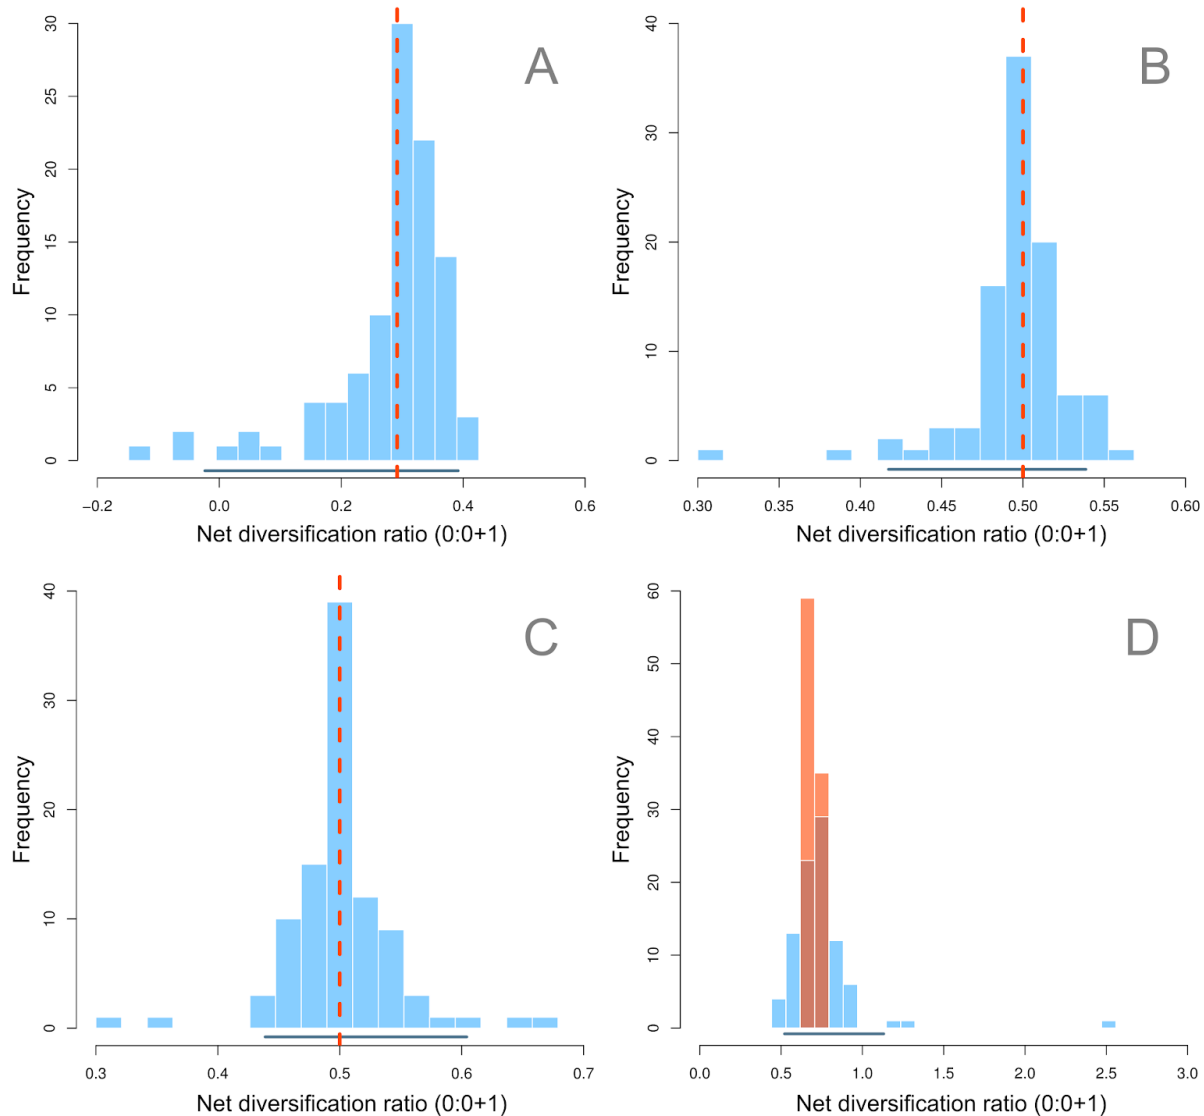

**Figure 4** Effect of endemic ranges on net diversification estimated for simulation scenarios A to D. Plots show the distribution of ratios between net diversification rates for areas  $0$  and  $0+1$  computed for each simulation replicate. Red dashed vertical lines in plots A to C represent the true value for the ratios. Horizontal lines in the bottom show the 95% density interval for each distribution of parameter estimates. Plot D shows the distribution of true ratios in orange. Estimates are the result of model averaging across 18 different models using Akaike weights. See Table 1 for the list of models and Figure S3 for AIC weights.

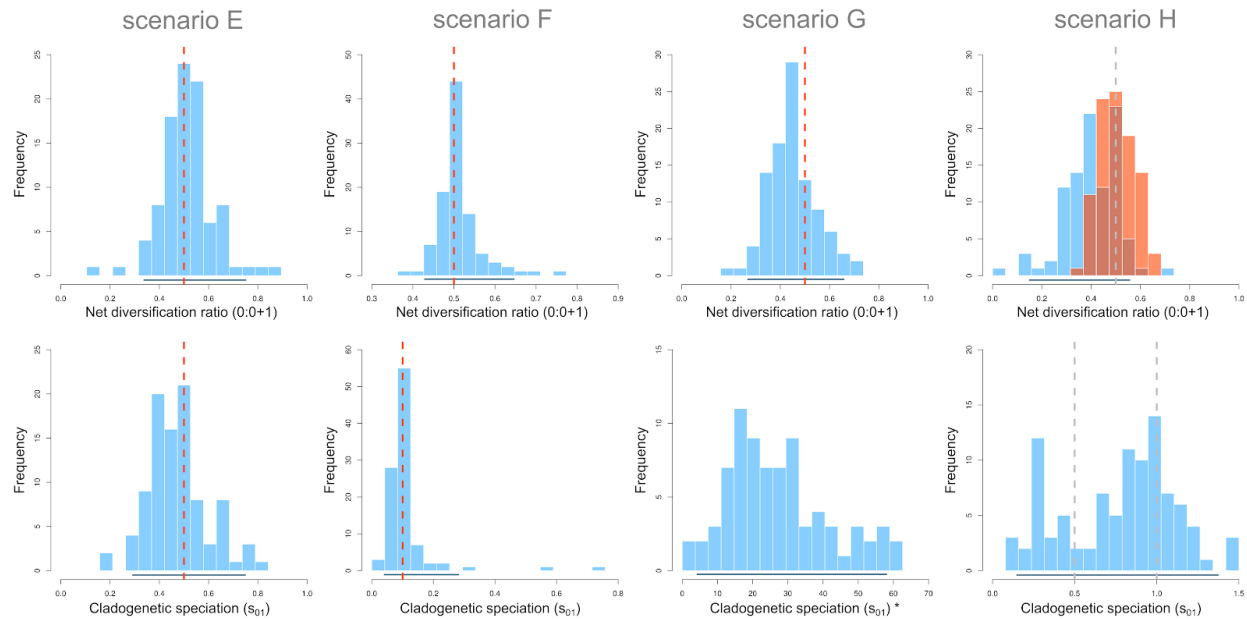

**Figure 5** Net diversification ratios between endemic areas and cladogenetic speciation rates estimated for simulation scenarios E to F. Upper row shows the distribution of ratios between net diversification rates for areas  $0$  and  $0+I$  computed for each simulation replicate. Lower row shows the distribution of speciation rates associated with the widespread area (parameter  $s_{0I}$ ) averaged across all tips (for E, F and H) or nodes (for G) of the phylogeny for each simulation replicate. Red dashed vertical lines represent the true value for the parameter. Grey dashed lines mark important reference points but are not the expected value for the quantities. Plot upper H shows the distribution of true ratios in orange (see main text). Horizontal lines in the bottom show the 95% density interval for each distribution of parameter estimates. The ‘\*’ marks results based on the average across nodes instead of tips (no data available at the tips). Estimates are the result of model averaging across 18 different models using Akaike weights. See Table 1 for the list of models and Figure S4 for AIC weights.

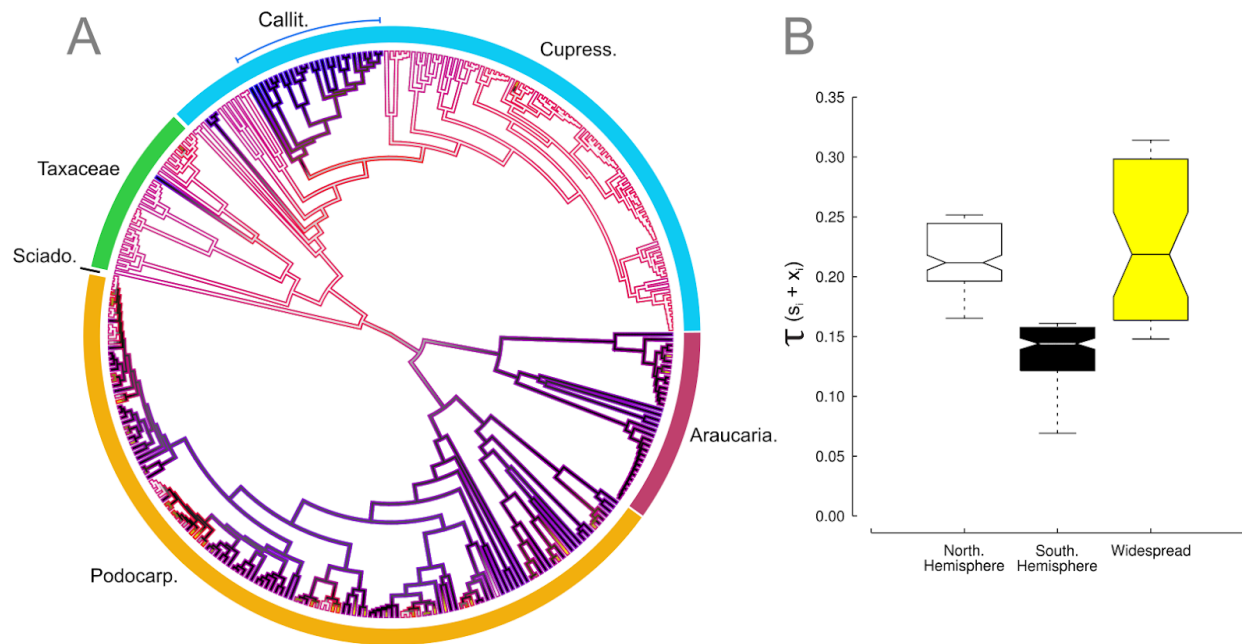

**Figure 6** (A) Geographic area reconstruction of areas and turnover rates (i.e.,  $\tau = s_i + x_i$ ) across a large set of models of Northern Hemisphere (white branches), Southern Hemisphere (black branches), and lineages in both (yellow branches) across Cupressophyta. The major clades are labeled and estimates of the most likely state and rate are based on the model-averaged marginal reconstructions inferred across a large set of models (see main text). The color gradient on a given branch ranges from the slowest turnover rates (blue) to the highest rates (red). (B) The distribution of turnover rates estimated for contemporary species currently inhabiting each of the geographic areas indicate that both Northern Hemisphere and widespread species generally experience higher turnover rates (i.e., more speciation and more extinction) relative to Southern Hemisphere species. Araucaria. = Araucariaceae, Callit. = Callitroids, Cupress. = Cupressaceae, Podocarp. = Podocarpaceae, Sciado. = Sciadopityaceae.
